# Supplementary material
Source: publisher figshare collection journal article supplement (https://scielo.figshare.com/articles/dataset/_/5720572)
Supplement: Supplementary file 1 [file Table_1.xls]

## Sheet: Table_1
<b><strong>Ecosystem</strong></b>	<b><strong>Tree community attributes</strong></b>
	<strong>Ni</strong>	<strong>R</strong>	<strong>U</strong>	<strong>H&#8217;</strong>	<strong>BA</strong>	<strong>RPC</strong>
					<strong>m<sup>3</sup></strong>	<strong>%</strong>
LAS	149	61	0.68	3.41	2.90	4
MAS	82	43	0.74	3.25	4.97	19
	<strong>Soil attributes</strong>
	<strong>P</strong>	<strong>K</strong>	<strong>Ca</strong>	<strong>Mg</strong>	<strong>pH</strong>	<strong>SM</strong>
	<strong>mg dm<sup>-3</sup></strong>	<strong>--------cmol<sub>c</sub> kg<sup>-1</sup>--------</strong>				<strong>%</strong>
	0-5 cm
LAS	1.50<sup>a</sup>	0.28<sup>b</sup>	3.05<sup>a</sup>	2.02<sup>a</sup>	4.46<sup>b</sup>	20.71<sup>b</sup>
MAS	1.96<sup>a</sup>	0.46<sup>a</sup>	3.68<sup>a</sup>	2.33<sup>a</sup>	5.11<sup>a</sup>	32.94<sup>a</sup>
	5-10 cm
LAS	0.63<sup>b</sup>	0.22<sup>b</sup>	1.47<sup>a</sup>	1.51<sup>b</sup>	4.16<sup>b</sup>	20.10<sup>b</sup>
MAS	1.17<sup>a</sup>	0.29<sup>a</sup>	2.08<sup>a</sup>	1.88<sup>a</sup>	4.82<sup>a</sup>	27.57<sup>a</sup>
