# Supplementary material
Source: publisher figshare collection journal article supplement (https://scielo.figshare.com/articles/dataset/_/5720572)
Supplement: Supplementary file 2 [file Table_2.xls]

## Sheet: Table_2
<b><strong>Functional group</strong></b>	<b><strong>LAS</strong></b>	<b><strong>MAS</strong></b>	<b><strong>LAS</strong></b>	<b><strong>MAS</strong></b>
	<strong>Dry season</strong>		<strong>Rainy season</strong>
S/P	5.06<sup>b</sup> (0.76)	6.25<sup>a</sup> (2.71)	1.40<sup>b</sup> (0.26)	11.33<sup>a</sup> (4.24)
M/S	3.78<sup>a</sup> (0.41)	4.25<sup>a</sup> (0.57)	8.38<sup>a</sup> (1.41)	9.34<sup>a</sup> (1.72)
H	2.62<sup>a</sup> (0.33)	2.29<sup>a</sup> (0.38)	1.80<sup>a</sup> (0.31)	2.13<sup>a</sup> (0.42)
P	0.69<sup>a</sup> (0.10)	0.33<sup>b</sup> (0.07)	0.52<sup>a</sup> (0.12)	0.35<sup>a</sup> (0.07)
S	0.25<sup>a</sup> (0.04)	0.13<sup>b</sup> (0.02)	0.31<sup>a</sup> (0.11)	0.37<sup>a</sup> (0.18)
Total	12.40<sup>b</sup> (0.55)	13.26<sup>a</sup> (1.32)	12.41<sup>b</sup> (0.89)	23.52<sup>a</sup> (2.24)
