# Supplementary material
Source: publisher figshare collection journal article supplement (https://scielo.figshare.com/articles/dataset/_/5720572)
Supplement: Supplementary file 3 [file Table_3.xls]

## Sheet: Table_3
<b><strong>Ecosystem</strong></b>	<b><strong>Season</strong></b>	<b><strong>Taxonomic group</strong></b>
LAS	Dry	Auchenorryncha, Dermaptera, Heteroptera, Hymenoptera, Isopoda, Isoptera, larvae of Lepidoptera, Opilionida, Pseudoscorpionida and Psocoptera
	Rainy	Auchenorryncha, Chilopoda, Dermaptera, Diplura, Heteroptera, Hymenoptera, Isopoda, Isoptera, larvae of Diptera, Orthoptera, Psocoptera and Thysanoptera
MAS	Dry	Auchenorryncha, Dermaptera, Heteroptera, Hymenoptera, Opilionida and Pseudoscorpionida
	Rainy	Auchenorryncha, Blattodea, Chilopoda, Dermaptera, Diplopoda, Diplura, Heteroptera, Hymenoptera, Isopoda, larvae of Coleoptera, larvae of Diptera, Psocoptera and Symphyla
