# Supplementary material
Source: publisher figshare collection journal article supplement (https://scielo.figshare.com/articles/dataset/_/5720572)
Supplement: Supplementary file 4 [file Table_4.xls]

## Sheet: Table_4
<b><strong>Structural attribute</strong></b>	<b><strong>LAS</strong></b>	<b><strong>MAS</strong></b>	<b><strong>LAS</strong></b>	<b><strong>MAS</strong></b>
	<strong>Dry season</strong>		<strong>Rainy season</strong>
R	17	13	18	20
U	0.68	0.65	0.44	0.42
H’	2.77	2.39	1.82	1.82
