# Supplementary material
Source: publisher figshare collection journal article supplement (https://scielo.figshare.com/articles/dataset/_/5720572)
Supplement: Supplementary file 5 [file Table_5.xls]

## Sheet: Table_5
<b><strong>Season</strong></b>	<b><strong>Ecosystem</strong></b>	<b><strong>LSS</strong></b>	<b><strong>N</strong></b>	<b><strong>P</strong></b>	<b><strong>K</strong></b>	<b><strong>Ca</strong></b>	<b><strong>Mg</strong></b>
		<strong>(Mg ha<sup>-1</sup>)</strong>	<strong>------------------(g kg<sup>-1</sup>)------------------</strong>
Dry	LAS	10.22<sup>a</sup><br>(3.38)	13.70<sup>a</sup><br>(3.56)	0.65<sup>a</sup><br>(0.28)	0.37<sup>a</sup><br>(0.12)	9.72<sup>a</sup><br>(4.03)	4.19<sup>a</sup><br>(1.78)
	MAS	6.47<sup>b</sup><br>(2.03)	11.40<sup>b</sup><br>(3.06)	0.67<sup>a</sup><br>(0.17)	0.43<sup>a</sup><br>(0.19)	21.00<sup>b</sup><br>(8.90)	5.86<sup>b</sup><br>(2.29)
Rainy	LAS	7.45<sup>a</sup><br>(2.53)	12.76<sup>a</sup><br>(1.82)	0.64<sup>a</sup><br>(0.14)	0.50<sup>a</sup><br>(0.17)	9.11<sup>a</sup><br>(3.73)	5.74<sup>a</sup><br>(1.55)
	MAS	5.04<sup>b</sup><br>(2.63)	15.21<sup>b</sup><br>(2.18)	1.06<sup>b</sup><br>(1.86)	0.31<sup>b</sup><br>(0.11)	21.27<sup>b</sup><br>(6.75)	4.79<sup>b</sup><br>(1.12)
