# Supplementary material
Source: publisher figshare collection journal article supplement (https://scielo.figshare.com/articles/dataset/_/5720572)
Supplement: Supplementary file 6 [file Table_6.xls]

## Sheet: Table_6
<b><strong>Site</strong></b>	<b><strong>Ecosystem</strong></b>	<b><strong>Age (years)/Stage of regeneration</strong></b>	<b><strong>Ab/D</strong></b>	<b><strong>R</strong></b>
Puerto Rico	Tropical Wet Forest1	5; 30; > 60	-	7-10; 15-21; 18-26
Mexico	Tropical Montane Cloud Forest2	15; 45; 75; 100	16.6; 28.7; 52.6; 54.9 ind. m<sup>-2</sup>	-
Brazil	Amazonian Forest3	Secondary forest; primary forest	29,776; 7,168 ind. m<sup>-2</sup>	21; 13
	Amazonian Forest4	Young (4-7); medium (11-15); old secondary forests (20-40); old-growth forest	1,191; 1,374; 2,221; 1,758 ind. m<sup>-2</sup>	15.1; 15.3; 17.4; 16.1
	Atlantic Forest5 <a><sup>*</sup></a>	YP<a><sup>**</sup></a> (19); MP<a><sup>**</sup></a> (42); native forest	13.5; 20.6; 25.5 ind. pitfall<sup>-1</sup> day<sup>-1</sup>	19; 20; 23
	Atlantic Forest6	6; 15; 35; 70; 130; 300	165; 110; 178; 223; 195; 243 ind.	5; 6; 9; 10; 11; 12
	Atlantic Forest7 <a><sup>*</sup></a>	LAS<a><sup>***</sup></a>; MAS<a><sup>***</sup></a>	12.41; 18.39 ind. pitfall<sup>-1</sup> day<sup>-1</sup>	18; 17
	Atlantic Forest8 <a><sup>*</sup></a>	Initial; medium; advanced stage	1941; 1384; 2156 ind. m<sup>-2</sup>	16; 18; 20
	Atlantic Forest 9 <a><sup>*</sup></a>	Initial; medium; advanced stage	9.54; 18.28; 25.53	19; 20; 22
	Cerrado Seasonal Forest10	Initial; mature	-	13; 19
